# Supplementary material for: Silk fibroin-derived polypeptides additives to promote hydroxyapatite nucleation in dense collagen hydrogels
Source: PLoS One. 2019 Jul 15;14(7):e0219429. doi: 10.1371/journal.pone.0219429 (PMC6629059; doi:10.1371/journal.pone.0219429)
Supplement: S10 File — (XLSX) [file pone.0219429.s010.xlsx]

## Sheet: S10 File
	Mass	Mass	Mass	Mass	Mass
	g	g	g	g	g
	DC	1:2 Cs DC	1:1 Cs DC	1:2 Cp DC	1:1 Cp DC
D0	0.0046	0.0057	0.0037	0.0073	0.0103
D0	0.0042	0.0052	0.0049	0.0068	0.0106
D0	0.0053	0.0047	0.0038	0.0078	0.0093
D0	0.0053	0.0048	0.0042	0.007	0.0109
D3	0.0063	0.0053	0.0052	0.0071	0.0103
D3	0.0064	0.0049	0.0056	0.0072	0.0102
D3	0.0063	0.0054	0.005	0.0077	0.0107
D3	0.0068	0.0058	0.0055	0.0076	0.0095
D7	0.0052	0.0051	0.0042	0.0052	0.0092
D7	0.0052	0.0047	0.0041	0.0075	0.0081
D7	0.0054	0.0039	0.004	0.0068	0.0088
D7	0.005	0.0048	0.0038	0.0064	0.0089
